1 **Viral etiology of Acute Respiratory Infections in Hospitalized**  
2 **Children in Novosibirsk City, Russia (2013 – 2017)**

3

4 **Olga Kurskaya<sup>1\*</sup>, Tatyana Ryabichenko<sup>2</sup>, Natalya Leonova<sup>3</sup>, Weifeng Shi<sup>4</sup>,**  
5 **Hongtao Bi<sup>5</sup>, Kirill Sharshov<sup>1</sup>, Eugenia Kazachkova<sup>1</sup>, Ivan Sobolev<sup>1</sup>, Elena**  
6 **Prokopyeva<sup>1</sup>, Tatyana Kartseva<sup>2</sup>, Alexander Alekseev<sup>1</sup>, Alexander**  
7 **Shestopalov<sup>1</sup>**

8

9 <sup>1</sup> Department of Experimental Modeling and Pathogenesis of Infectious Diseases,  
10 Federal Research Center of Fundamental and Translational Medicine, Novosibirsk,  
11 Russia

12 <sup>2</sup> Department of propaedeutic of childhood diseases, Novosibirsk State Medical  
13 University, Novosibirsk, Russia

14 <sup>3</sup> Department of Children's Diseases, Novosibirsk Children's Municipal Clinical  
15 Hospital №6, Novosibirsk, Russia

16 <sup>4</sup> Key Laboratory of Etiology and Epidemiology of Emerging Infectious Diseases in  
17 Universities of Shandong, Taishan Medical College, Taian, Shandong, China

18 <sup>5</sup> Qinghai Key Laboratory of Tibetan Medicine Pharmacology and Safety  
19 Evaluation, Northwest Institute of Plateau Biology, CAS, Xining, China

20

21

22 \* kurskaya\_og@mail.ru

## 23 **Introduction**

24 Acute respiratory infections (ARIs) pose a significant public health problem  
25 worldwide, causing considerable morbidity and mortality among people of all age  
26 groups [1]. Children are on average infected two to three times more frequently than  
27 adults. [2]. There are more than 200 respiratory viruses that can cause ARIs.  
28 Respiratory syncytial virus (RSV), human rhinovirus (HRV), human  
29 metapneumovirus (HMPV), human parainfluenza virus (PIV), human enterovirus  
30 (EV), influenza virus (IFV), human coronavirus (CoV), adenovirus (ADV), and  
31 human bocavirus (BoV) are the most common viral agents associated with ARIs,  
32 accounting for around 70 % of ARIs [3, 4]. The frequency of mixed respiratory viral  
33 detection varies from 10% to 30% in hospitalized children [5-7]. In addition, several  
34 new human respiratory viruses have been described in recent years, including human  
35 metapneumovirus [8, 9], human bocavirus, and novel human coronaviruses,  
36 including severe acute respiratory syndrome coronavirus (SARS-CoV) [10], human  
37 coronaviruses NL63 (HCoV-NL63), HKU1 (HCoV-HKU1) [11], and Middle East  
38 respiratory syndrome coronavirus (MERS - CoV) [12].  
39 Although the majority of ARIs are associated with respiratory viruses, antibiotics  
40 are often used in the clinical treatment of ARIs. As children with ARTIs often have  
41 similar clinical symptoms, studying the clinical characteristics of children with  
42 virus-related ARIs and the spectrum of respiratory viruses will facilitate the  
43 development of precise treatments for ARIs [13]. Rapid diagnosis is important not

44 only for timely treatment starting but also for the detection of a beginning influenza  
45 epidemic and the avoidance of unnecessary antibiotic treatment [14, 15].

46 Western Siberia is of great importance in ecology and epidemiology of emerging  
47 diseases. This territory was involved in the circulation of A/H5N1 and A/H5N8  
48 avian influenza viruses in 2005 – 2017 [16, 17]. These viruses were spread by wild  
49 birds' migration. Western Siberia is a place of crossing of birds' migratory flyways  
50 wintering in different regions of the world: Europe, Africa, Middle East, Central  
51 Asia, Hindustan, and South East Asia. Therefore, there is high probability of  
52 emergence of reassortant strains between human and animal influenza viruses, as  
53 well as emergence of local outbreaks of human morbidity caused by uncommon  
54 variants of influenza viruses. Furthermore, Novosibirsk is the largest transport hub  
55 in this part of Russia with numerous international connections, that is important for  
56 the spread of ARIs [18, 19].

57 The prevalence of respiratory viruses among children with ARIs differs in different  
58 regions and varies over time [20-24]. Thus, to better understand the epidemiology  
59 of Acute Respiratory Infections in Russia, we investigated etiology of ARIs in  
60 children admitted to Novosibirsk Children's Municipal Clinical Hospital in 2013 -  
61 2017.

62

## 63 **Materials and methods**

### 64 **Ethics issues**

65 All aspects of the study were approved by the Ethics Committee of the Federal State  
66 Budgetary Institution "Research Center of Clinical and Experimental Medicine"  
67 (2013-23). Accordingly, written informed consent was obtained from parents prior  
68 to sample taking.

## 69 **Patients and specimens**

70 Participants enrolled to the study were children 0–15 years of age within 3 days of  
71 illness onset and had at least two of the following symptoms: fever, sore throat,  
72 cough, rhinorrhea, nasal congestion, sputum, shortness of breath, lung auscultation  
73 abnormalities, tachypnea, and chest pain. Paired nasal and throat swabs were  
74 collected from each patient admitted to Novosibirsk Children's Municipal Clinical  
75 Hospital by hospital nurses. A total of 1560 samples collected during four epidemic  
76 seasons of 2013 – 2017 (October – April) were enrolled to the study. The  
77 epidemiological and clinical information including case history, symptoms, physical  
78 signs, and examination were included in a standardized questionnaire. The samples  
79 were placed immediately in viral transport medium (Eagle MEM, BSA and  
80 antibiotics) and stored at 4–8°C prior transportation to the laboratory (not more than  
81 24 hours). Detection of respiratory viruses was performed immediately after delivery  
82 to the laboratory. All specimens were tested for 15 common respiratory viruses,  
83 including influenza virus types A, B (IFVA and IFVB), human parainfluenza virus  
84 (HPIV) types 1-4, human respiratory syncytial virus (HRSV), human  
85 metapneumovirus (HMPV), four human coronaviruses (HCo), human rhinovirus

86 (HRV), human adenovirus (HAdV) and human bocavirus (HBoV), using a real-time  
87 PCR assay-kit.

## 88 **Nucleic acid extraction and reverse transcription**

89 Viral nucleic acids were extracted from nasal and throat swabs using RNA/DNA  
90 extraction kit «RIBO-sorb» (Interlabservice, Russia) according to the  
91 manufacturer's instructions. The extracted viral nucleic acid was immediately used  
92 to perform the reaction of reverse transcription using commercial kit "REVERTA-  
93 L" (Interlabservice, Russia).

## 94 **Virus detection**

95 Detection of respiratory viruses, including HPIV 1-4, HRSV, HMPV, HCoV-OC43,  
96 HCoV-229E, HCoVNL63, HCoV-HKU1, HRV, HAdV, and HBoV was performed  
97 using a RT-PCR Kit «AmpliSens ARVI-screen-FL» (Interlabservice, Russia), and  
98 IFVA and IFVB virus detection was performed using a RT-PCR Kit «AmpliSens  
99 Influenza virus A/B-FL» (Interlabservice, Russia) according to the manufacturer's  
100 instructions. Positive and negative controls were included in each run.

## 101 **Statistical analysis**

102 Two-tailed chi-square test (two by two table) was performed to compare the  
103 infection rates for respiratory viruses among different age groups. P-value <0.05 was  
104 considered to be statistically significant.

105

## 106 **Results**

### 107 **Patient characteristics**

108 Totally, 1560 samples collected from patients with ARI during the period from  
 109 December 2013 to April 2017 were enrolled in the investigation. There were 824  
 110 males (52.8%) and 736 females (47.2%), and the patient's ages ranged from 3  
 111 months to 15 years. The majority of them (43.2%) were between 1 and 3 years old.  
 112 The age distribution is shown in Table 1.

113

114 **Table 1. Patient characteristics of 1560 children with ARI in Novosibirsk**  
 115 **Children's Municipal Clinical Hospital from 2013 to 2017**

| Characteristics of the population |               | ARI (%)*         | Infected (%)**                |                               |                            |
|-----------------------------------|---------------|------------------|-------------------------------|-------------------------------|----------------------------|
|                                   |               | Total<br>N= 1560 | Total<br>infection<br>N= 1128 | Single<br>infection<br>N= 965 | Co-<br>infection<br>N= 163 |
| <b>Gender</b>                     | <b>Male</b>   | 824 (52.8)       | 601 (72.9)                    | 504 (61.2)                    | 97 (11.7)                  |
|                                   | <b>Female</b> | 736 (47.2)       | 527 (71.6)                    | 461 (62.6)                    | 66 (9.0)                   |
| <b>Age group<br/>(years)</b>      | <b>&lt; 1</b> | 325 (20.8)       | 237 (72.9)                    | 194 (59.7)                    | 43 (13.2)                  |
|                                   | <b>1 – 3</b>  | 674 (43.2)       | 523 (77.6)                    | 436 (64.7)                    | 87 (12.9)                  |
|                                   | <b>4 – 6</b>  | 259 (16.6)       | 201 (77.6)                    | 178 (68.7)                    | 23 (8.9)                   |
|                                   | <b>≥ 7</b>    | 302 (19.4)       | 167 (55.3)                    | 157 (52.0)                    | 10 (3.3)                   |

116 \*- Proportion of each group in all the samples

117 \*\* - Proportion of virus-positive samples in each gender or age group

118

119 **Detection of respiratory viruses**

120 Among 1560 samples, 1128 (72.3 %) were found positive for at least one virus, and  
121 432 (27.7%) were negative for all respiratory viruses tested (Table 1). There was no  
122 significant difference in the incidence of respiratory viral infection between boys  
123 (601/824; 72.9%) and girls (527/736; 71.6%) ( $\chi^2 = 0.345$ ,  $p > 0.05$ ). The respiratory  
124 virus positive rate appeared to decrease with age. The lowest positive rate was  
125 observed in the age group of more than 6 years old (167/302; 55.3%), while the  
126 positive rates in age groups less than 6 years old were more than 70% (Table 1).  
127 Statistically significant difference was observed between the age group of more than  
128 6 years old and other age groups ( $\chi^2 = 54.113$ ,  $p < 0.01$ ). No statistically significant  
129 difference was observed among the age groups less than 1 year old, 1 – 3 years, and  
130 4 – 6 years.

131 Among all the samples, single infections accounted for 61.9% (965/1560), while co-  
132 infections accounted for 10.4% (163/1560) with the lowest rate of incidence in  
133 children more than 6 years old compared to children younger than 6 years ( $\chi^2 =$   
134 20.389,  $p < 0.01$ ) (Fig 1).

135

136 **Fig 1. Viral co-infection rate in different age groups.**

137

### 138 **Viral etiology**

139 RSV and IFV were the most frequently detected viruses with high incidence of  
140 23.0% (358/1560) and 22.1% (344/1560), respectively, among all patients with  
141 ARIs. HRV was detected in 15.1% (235/1560), followed by HMPV, HPIV and

142 HBoV with the detection rates higher than 5.0%. The positivity rates of HCoV and  
143 HAdV were lower than 5.0% (Fig 2).

144

145 **Fig 2. Detection rates of viral pathogens in single and co-infections in children**  
146 **with ARIs (2013 – 2017).**

147

### 148 **Age and gender distribution**

149 The data was analyzed with regard to the age and gender distribution of virus  
150 infection. Of the enrolled patients, 824 (52.8%) were male and 736 (47.2%) were  
151 female. All the patients were grouped into four age groups with different positive  
152 rate of viral infections. No difference in the etiological distribution of viral  
153 pathogens was observed between males and females.

154 Among detected respiratory viruses, HRV, HPIV, HCoV, and HAdV did not have  
155 statistically significant difference in the distribution among the different age groups.  
156 HMPV was detected in age group less than 1 year old much more frequently than in  
157 children older than 1 year ( $\chi^2 = 6.627$ ,  $p < 0.05$ ). HBoV was significantly more  
158 frequently observed in children younger than 3 years old compare with children of  
159 4 – 15 years old ( $\chi^2 = 28.523$ ,  $p < 0.005$ ). The incidence of RSV decreased  
160 significantly with increasing age ( $p < 0.05$ ) dropping from 35.1% in children  
161 younger than 1 year old to 5.3% in the school-age children (7 – 15 years old group),  
162 while the reverse relationship was observed for IFV (Fig 3).

163



164 **Fig 3. The distribution of respiratory viruses in different age groups.**

165

166 **Seasonal distribution**

167 The data was analyzed with regard to the seasonality. Figure 4 illustrates the monthly  
168 distribution of the most frequently detected viruses (HRSV, HRV and IFV) from  
169 2013 to 2017. We have observed no considerable activity of Influenza viruses in  
170 2013 – 2014 epidemic season, but increasing activity detected in subsequent years  
171 with peaks in February 2015, February 2016 and January and February 2017. HRSV  
172 exhibited marked peaks during each season: in January 2014, March 2015,  
173 December 2015 and March 2017. For HRV monthly distribution was relatively  
174 constant with only one clear peak in October – November 2014 (Fig 4).

175

176 **Fig 4. Monthly distribution of HRSV, HRV and IFV.**

177

178 **Multiple Infections**

179 Co-infections with two or more viruses were detected in 163 out of the 1128 (14.5%)  
180 positive samples (Table 1). Dual infections accounted for 11.4% (129/1128) of all  
181 positive samples and three viruses were detected in 3.1% (34/1128) of positive  
182 samples. Most co-infected patients were 0-6 years of age (12.2%, 153/1258) versus  
183 children older than 6 years (3.4%, 10/292). No significant difference was found for  
184 incidence of co-infections between the age group less than 1 year (13.2%, 43/325),  
185 1 – 3 years (12.9%, 87/674), and 4 – 6 years (8.9%, 23/259). The most common

186 combinations were HRSV/HRV, and IFV/HRSV, which amounted to 13.5%  
 187 (22/168) and 12.3% (20/163) of all cases of co-infection respectively. Co-infection  
 188 rate of each individual virus detected varied significantly. Viruses appearing most  
 189 often in co- infections were DNA-viruses –HAdV and HBoV – in 52.7% (29/55) of  
 190 cases of adenovirus detection and in 45.1% (41/91) of cases of bocavirus detection.  
 191 HRV was the most often co-infected with HBoV (34.1%, 14/41) and HAdV (31%,  
 192 9/29). We have not detected any case of simultaneous infection of HAdV and HBoV.  
 193 All occurring combinations of viruses are shown in table 2.

194

195 **Table 2. Detection of single and co-infection cases among 1560 children with**  
 196 **ARI in Novosibirsk Municipal Clinical Hospital from 2013 to 2017**

| <b>Virus detected</b> | <b>IFV</b> | <b>HRSV</b> | <b>HRV</b> | <b>HPIV</b> | <b>HMpV</b> | <b>HCoV</b> | <b>HAdV</b> | <b>HBoV</b> |
|-----------------------|------------|-------------|------------|-------------|-------------|-------------|-------------|-------------|
| <b>IFV</b>            | <b>291</b> | 20          | 7          | 2           | 9           | 0           | 6           | 6           |
| <b>HRSV</b>           |            | <b>285</b>  | 22         | 6           | 4           | 2           | 4           | 8           |
| <b>HRV</b>            |            |             | <b>158</b> | 6           | 8           | 0           | 9           | 14          |
| <b>HPIV</b>           |            |             |            | <b>60</b>   | 3           | 1           | 1           | 5           |
| <b>HMpV</b>           |            |             |            |             | <b>84</b>   | 0           | 2           | 1           |
| <b>HCoV</b>           |            |             |            |             |             | <b>9</b>    | 0           | 1           |
| <b>HAdV</b>           |            |             |            |             |             |             | <b>26</b>   | 0           |
| <b>HBoV</b>           |            |             |            |             |             |             |             | <b>50</b>   |

|                          |            |            |            |           |            |           |           |           |
|--------------------------|------------|------------|------------|-----------|------------|-----------|-----------|-----------|
| <b>Dual infections</b>   | <b>50</b>  | <b>66</b>  | <b>66</b>  | <b>24</b> | <b>27</b>  | <b>4</b>  | <b>22</b> | <b>35</b> |
| <b>Triple infections</b> | <b>3</b>   | <b>7</b>   | <b>11</b>  | <b>3</b>  | <b>4</b>   | <b>0</b>  | <b>7</b>  | <b>6</b>  |
| <b>Total</b>             | <b>344</b> | <b>358</b> | <b>235</b> | <b>87</b> | <b>115</b> | <b>13</b> | <b>55</b> | <b>91</b> |

197

## 198 **Influenza viruses in etiology of ARIs**

199 IFV was one of the most frequently detected viruses among children with ARIs with  
200 detection rate 22.1% (344/1560). The lowest detection rate of IFV was in the less  
201 than 1 year old age group (5.8%, 19/325). The incidence of IFV increased  
202 significantly with increasing patients' age (p-value < 0.0001) showing 32.6%  
203 (183/561) in children older than 3 years.

204 During the study period the lowest influenza activity was investigated in 2013 –  
205 2014 with positivity rate 6.9% of all positive samples. In 2014 – 2015 influenza virus  
206 detection was 17.2% while in 2015 – 2016 and 2016 – 2017 the detection rates were  
207 much higher and amounted to 32.2% and 30.2% respectively. Influenza A(H3N2)  
208 virus was predominant in 2013 - 2014 and 2014 – 2015 accounting for 57.9% and  
209 69.8% of all influenza virus detections while in 2015 – 2016 82% of influenza  
210 viruses were A(H1N1) pdm09. We have not detected any influenza A(H3N2)  
211 viruses during 2015 – 2016 epidemic season. In 2016 – 2017 influenza type B  
212 detections (52%) predominating over type A (48%). Of influenza A viruses, all of  
213 them were A(H3N2) viruses (Fig 5).

214

215 **Fig 5. Distribution of influenza A and B viruses in 2013 – 2017**

216

## 217 **Discussion**

218 Acute respiratory infections are a serious health and economic problem, causing  
219 high morbidity and significant economic losses due to temporary disability  
220 payments and medical costs. Children are the most susceptible group to the  
221 development of the disease. ARIs can lead to serious diseases such as bronchiolitis  
222 and pneumonia and sometimes even cause death in infants and children worldwide  
223 [25]. Nevertheless, most of the data on the epidemiological features and etiological  
224 structure of ARIs were from more-developed countries, and less is known about the  
225 etiology of ARIs in Russia. In the present study, we examined the viral etiology of  
226 ARIs in hospitalized children in Novosibirsk by Real-Time RT-PCR assay.

227 We detected at least one of the tested viruses in 72.3% (1128/1560) of the samples.  
228 In similar studies conducted in different regions of the world, the virus detection rate  
229 ranged from less than 50% to 75% [26-28]. For example, in studies performed in  
230 China, the proportion of positive samples in children with ARIs ranged from 37.6%  
231 to 78.7% [14,16,29,30]. The previous study of respiratory infections among children  
232 in European part of Russia revealed the 71.5% detection rate of respiratory viruses  
233 [31].

234 The percentage of the respiratory viruses' detection varies in different years in  
235 different regions, which may be associated with climatic and environmental factors,

236 population distribution, economic status and diagnostic methods used [1]. In  
237 addition, seasonality of sampling can also lead to differences in the level of viruses'  
238 detection in various studies. Thus, Ju X. et al. carried out a study continuously from  
239 July 2011 through July 2013 and found 48.66 % of samples to be positive for at least  
240 one respiratory virus [32]. In contrast, we collected samples only during epidemic  
241 seasons of ARIs, so the positivity rate in our study was considerably higher.  
242 Furthermore, acute respiratory infections can be caused by viruses that are not yet  
243 known, as well as bacteria that have not been included in these studies [13].  
244 We found that the prevalence of respiratory viruses did not differ between boys and  
245 girls (72.9% and 71.6% respectively), which confirms the absence of a gender-based  
246 susceptibility to respiratory viral infections [13]. However, we observed a decrease  
247 in the respiratory viruses' detection rate with age, with the lowest detection rate in  
248 school-age children compared to children under 7 years of age (55.3% versus 76.4%,  
249 respectively). These data are consistent with findings obtained in other regions of  
250 Russia [31] and it may be due to decreased sensitivity to respiratory virus infections  
251 in older children.  
252 Etiology of ARIs and the respiratory virus prevalence varies in different studies. In  
253 the United States, IFV, HRSV and HPIV were the most frequently detected [33].  
254 Studies conducted in France have shown that metapneumovirus and respiratory  
255 syncytial virus are the most common [34]. IFV, HRSV and HRV were the most  
256 commonly detected respiratory viruses among children with ARIs in most regions  
257 of China [13]. The study of ARIs etiologic structure showed that HRSV, HRV, HPIV

258 and IFV were registered significantly often among children in western part of Russia  
259 [31].

260 In our study the most common viruses detected were HRSV and IFV, followed by  
261 HRV. The age distribution of ARIs indicated that children under 3 years old were  
262 more likely to be infected by HRSV confirmed the importance of RSV in children  
263 with ARIs, especially in children < 4 years of age [35-38]. We observed a high rate  
264 of RSV-detections in 2013 – 2014 (44.4%), while in 2016 – 2017 it was less than  
265 10% which could be due to the annual variation in the circulation pattern of RSV.  
266 Such year-to-year variation in the epidemiological patterns of viral infections  
267 confirms importance of the long-term study of the ARIs epidemiology [39].

268 Influenza virus is one of the major causative agents of respiratory disease in humans  
269 and leads to a more severe disease than the common cold which is caused by a  
270 different type of virus [40]. In temperate countries influenza outbreaks usually occur  
271 during the winter season. Finally, in our study, IFV (344/1560, 22.1%) was the  
272 second most frequent detected pathogen with markable seasonality in winter months.  
273 During the 2013-2014 epidemic season, influenza virus detection rate was low -  
274 6.9% of all respiratory viruses, which was in accordance with the official influenza  
275 surveillance results of Ministry of Health, Russia [41]. In 2014-2015, influenza  
276 viruses were detected in 17.2% among all respiratory viruses. Herewith, the  
277 percentage of influenza A virus accounted for 73.3% and influenza B virus – 26.7%  
278 of all detected influenza viruses. At the same time, in Russia influenza B was the  
279 main etiological agent, accounting for 50.6% of all detected influenza viruses. In

280 2015-2016, influenza A(H1N1) pdm09 virus was predominant in Russia, accounting  
281 for 79% of all influenza-positive samples consistent with our results (82%). In 2016-  
282 2017 influenza A(H3N2) virus was dominant in Russia detected in 61.3% of all  
283 influenza virus cases [41]. In our study influenza A and B viruses were detected with  
284 approximately the same frequency (48% and 52% respectively).

285 With the introduction of molecular techniques, the detection of multiple co-infecting  
286 viruses has become common, though the prevalence of each virus varies between  
287 studies [42]. In our study detection rate of viral co-infection was 14.5% among the  
288 positive samples. According to the previous reports, the incidence of viral co-  
289 infection in children can reach 30% [43]. Most often co-infection found in children  
290 under the 5 years of age, that is associated with immaturity of the immune system  
291 and, thus, greater susceptibility to infection [44]. In our study, we significantly more  
292 frequently detected cases of simultaneous infection with two or more viruses in  
293 children under 7 years of age compared with children of school age (12.2% versus  
294 3.4%), while there was no significant difference in the incidence of viral co-infection  
295 between the age groups of 0 – 1 year, 1-3 years and 4 – 6 years.

296 Thus, in our study we investigated the etiological structure of acute respiratory viral  
297 infections in hospitalized children in Novosibirsk, Russia, and evaluated age and  
298 seasonal distribution of the various respiratory viruses. Systematic monitoring of  
299 respiratory viruses is necessary to better understand the structure of respiratory  
300 infections. Such studies are important for the improvement and optimization of

301 diagnostic tactics, as well as measures for the control and prevention of the  
302 respiratory viral infections.

303

## 304 **Acknowledgments**

305 We thank the clinicians of Novosibirsk Children's Municipal Clinical Hospital for  
306 their assistance with sample collection. We thank Dr. Galina Skosyreva and Elena  
307 Timofeeva (Department of propaedeutic of childhood diseases, Novosibirsk State  
308 Medical University, Novosibirsk, Russia) for their assistance with sample collection.

## 309 **References**

- 310 1. Wang H, Zheng Yu, Deng J, Wang W, Liu P, Yang F, et al. Prevalence of  
311 respiratory viruses among children hospitalized from respiratory infections  
312 in Shenzhen, China. *Viol J.* 2016; 13:39. DOI 10.1186/s12985-016-0493-7
- 313 2. Williams BG, Gouws E, Boschi-Pinto C, Bryce J, Dye C. Estimates of  
314 world-wide distribution of child deaths from acute respiratory infections.  
315 *Lancet Infect Dis.* 2002; 2:25–32;
- 316 3. Kusel MM, de Klerk NH, Holt PG, Keadze T, Johnston SL, Sly PD. Role  
317 of respiratory viruses in acute upper and lower respiratory tract illness in the  
318 first year of life: a birth cohort study. *Pediatr Infect Dis J.* 2006; 25:680–  
319 686;
- 320 4. Brittain-Long R, Nord S, Olofsson S, Westin J, Anderson LM, Lindh M.  
321 Multiplex real-time PCR for detection of respiratory tract infections. *J Clin*  
322 *Virol.* 2008; 41:53–56;



- 323 5. Lu Y, Wang S, Zhang L, Xu C, Bian C, Wang Z, et al. Epidemiology of  
324 human respiratory viruses in children with acute respiratory tract infections  
325 in Jinan, China. *Clin Dev Immunol*. 2013; 2013:210490. doi:  
326 10.1155/2013/210490;
- 327 6. Sentilhes AC, Choumlivong K, Celhay O, Sisouk T, Phonekeo D,  
328 Vongphrachanh P, et al. Respiratory virus infections in hospitalized children  
329 and adults in Lao PDR. *Influenza Other Respir Viruses*. 2013; 7(6):1070–78;
- 330 7. Tecu C, Mihai ME, Alexandrescu VI, Orășeanu D, Zapucioiu C, Ivanciuc  
331 AE, et al., Single and multipathogen viral infections in hospitalized children  
332 with acute respiratory infections. *Roum Arch Microbiol Immunol*. 2013;  
333 72(4), 242–9;
- 334 8. van den Hoogen BG, de Jong JC, Groen J, Kuiken T, de Groot R, Fouchier  
335 RA, et al. A newly discovered human pneumovirus isolated from young  
336 children with respiratory tract disease. *Nat Med*. 2001 Jun;7(6):719-24;
- 337 9. Feuillet F, Lina B, Rosa-Calatrava M, Boivin G. Ten years of human  
338 metapneumovirus research. *J Clin Virol*. 2012 Feb;53(2):97-105. doi:  
339 10.1016/j.jcv.2011.10.002. Epub 2011 Nov 9;
- 340 10. Drosten C, Günther S, Preiser W, van der Werf S, Brodt HR, Becker S, et  
341 al. Identification of a novel coronavirus in patients with severe acute  
342 respiratory syndrome. *N Engl J Med*. 2003 May 15;348(20):1967-76. Epub  
343 2003 Apr 10;

- 344 11. Pyrc K, Berkhout B, van der Hoek L. The novel human coronaviruses NL63  
345 and HKU1. *J Virol*. 2007 Apr;81(7):3051-7. Epub 2006 Nov 1;
- 346 12. Coleman CM, Frieman MB. Coronaviruses: Important Emerging Human  
347 Pathogens. *J Virol*. 2014 May;88(10):5209-12. doi: 10.1128/JVI.03488-13.  
348 Epub 2014 Mar 5;
- 349 13. Dong W, Chen Q, Hu Y, He D, Liu J, Yan H. Epidemiological and clinical  
350 characteristics of respiratory viral infections in children in Shanghai, China.  
351 *Arch Virol*. 2016 Jul;161(7):1907-13. doi: 10.1007/s00705-016-2866-z.  
352 Epub 2016 May 2;
- 353 14. Harper SA, Bradley JS, Englund JA, File TM, Gravenstein S, Hayden FG,  
354 et al. Seasonal influenza in adults and children—diagnosis, treatment,  
355 chemoprophylaxis, and institutional outbreak management: clinical practice  
356 guidelines of the Infectious Diseases Society of America. *Clin Infect Dis*.  
357 2009; 48:1003–32. doi: 10.1086/598513 PMID: 19281331;
- 358 15. Low D. Reducing antibiotic use in influenza: challenges and rewards. *Clin*  
359 *Microbiol Infect*. 2008 Apr; 14(4):298-306. Epub 2007 Dec 18;
- 360 16. Sharshov K, Romanovskaya A, Uzhachenko R, Durymanov A,  
361 Zaykovskaya A, Kurskaya O, Ilinykh P, Silko N, Kulak M, Alekseev A,  
362 Zolotykh S, Shestopalov A, Drozdov I. Genetic and biological  
363 characterization of avian influenza H5N1 viruses isolated from wild birds  
364 and poultry in Western Siberia. *Arch Virol*. 2010 Jul; 155(7):1145-1150;

- 365 17. Lee DH, Sharshov K, Swayne DE, Kurskaya O, Sobolev I, Kabilov M,  
366 Alekseev A, Irza V, Shestopalov A. Novel Reassortant Clade 2.3.4.4 Avian  
367 Influenza A(H5N8) Virus in Wild Aquatic Birds, Russia, 2016. *Emerg*  
368 *Infect Dis.* 2017 Feb; 23(2):359-360. doi: 10.3201/eid2302.161252. Epub  
369 2017 Feb 15;
- 370 18. Ilyicheva T, Sobolev I, Susloparov I, Kurskaya O, Durymanov A, Sharshov  
371 K, Shestopalov A. Monitoring of influenza viruses in Western Siberia in  
372 2008-2012. *Infect Genet Evol.* 2013 Dec; 20:177-87. doi:  
373 10.1016/j.meegid.2013.08.025. Epub 2013 Sep 5;
- 374 19. De Marco MA, Delogu M, Sivay M, Sharshov K, Yurlov A, Cotti C,  
375 Shestopalov A. Virological evaluation of avian influenza virus persistence in  
376 natural and anthropic ecosystems of Western Siberia (Novosibirsk Region,  
377 summer 2012). *PLoS One.* 2014 Jun 27; 9(6): e100859. doi:  
378 10.1371/journal.pone.0100859. eCollection 2014;
- 379 20. Zhang G, Hu Y, Wang H, Zhang L, Bao Y, Zhou X. High incidence of  
380 multiple viral infections identified in upper respiratory tract infected  
381 children under three years of age in Shanghai, China. *PLoS One.* 2012;  
382 7(9):e44568. doi: 10.1371/journal.pone.0044568. Epub 2012 Sep 7;
- 383 21. Huang G, Yu D, Mao N, Zhu Z, Zhang H, Jiang Z, et al. Viral etiology of  
384 acute respiratory infection in Gansu Province, China, 2011. *PLoS One.* 2013  
385 May 14;8(5): e64254. doi: 10.1371/journal.pone.0064254. Print 2013;

- 386 22. Cai XY, Wang Q, Lin GY, Cai ZW, Lin CX, Chen PZ, et al. Respiratory  
387 virus infections among children in South China. *J Med Virol.* 2014 Jul;  
388 86(7):1249-55. doi: 10.1002/jmv.23931. Epub 2014 Mar 12;
- 389 23. Richter J, Panayiotou C, Tryfonos C, Koptides D, Koliou M, Kalogirou N,  
390 et al. Aetiology of Acute Respiratory Tract Infections in Hospitalised  
391 Children in Cyprus *PLoS One.* 2016 Jan 13; 11(1): e0147041. doi:  
392 10.1371/journal.pone.0147041. eCollection 2016;
- 393 24. Khor CS, Sam IC, Hooi PS, Quek KF, Chan YF. Epidemiology and  
394 seasonality of respiratory viral infections in hospitalized children in Kuala  
395 Lumpur, Malaysia: a retrospective study of 27 years. *BMC Pediatr.* 2012  
396 Mar 20; 12:32. doi: 10.1186/1471-2431-12-32;
- 397 25. Tsukagoshi H, Ishioka T, Noda M, Kozawa K, Kimura H. Molecular  
398 epidemiology of respiratory viruses in virus-induced asthma. *Front*  
399 *Microbiol.* 2013 Sep 12;4:278. doi: 10.3389/fmicb.2013.00278;
- 400 26. Pierangeli A, Gentile M, Di MP, Pagnotti P, Scagnolari C, Trombetti S, et  
401 al. Detection and typing by molecular techniques of respiratory viruses in  
402 children hospitalized for acute respiratory infection in Rome, Italy. *J Med*  
403 *Virol.* 2007; 79:463–8. PMID: 17311326;
- 404 27. Hombrouck A, Sabbe M, Van Casteren V, Wullaume F, Hue D, Reynders  
405 M, et al. Viral aetiology of influenza-like illness in Belgium during the  
406 influenza A(H1N1)2009 pandemic. *Eur J Clin Microbiol Infect Dis.* 2012  
407 Jun;31(6):999-1007. doi: 10.1007/s10096-011-1398-4. Epub 2011 Sep 8;

- 408 28. Schlaudecker EP, Heck JP, Macintyre ET, Martinez R, Dodd CN, McNeal  
409 MM, et al. Etiology and seasonality of viral respiratory infections in rural  
410 Honduran children. *Pediatr Infect Dis J.* 2012; 31:1113–8. doi:  
411 10.1097/INF.0b013e31826052eb PMID: 22653487;
- 412 29. Peng J, Kong W, Guo D, Liu M, Wang Y, Zhu H, et al. The epidemiology  
413 and etiology of influenza-like illness in Chinese children from 2008 to 2010.  
414 *J Med Virol.* 2012 Apr; 84(4):672-8. doi: 10.1002/jmv.22247;
- 415 30. Li H, Wei Q, Tan A, Wang L. Epidemiological analysis of respiratory viral  
416 etiology for influenza-like illness during 2010 in Zhuhai, China. *Virol J.*  
417 2013 May 7; 10:143. doi: 10.1186/1743-422X-10-143;
- 418 31. Lvov NI, Pisareva MM, Maltsev OV, Buzitskaya JV, Afanasieva VS,  
419 Mikhailova MA, et al. [The features of ARVD etiological structure in  
420 different age and professional population groups in Saint-Petersburg during  
421 2013–2014 epidemic season]. *Journal of Infectology.* 2014; 6(3): 62-70.  
422 Russian;
- 423 32. Ju X, Fang Q, Zhang J, Xu A, Liang L, Ke C. Viral etiology of influenza-  
424 like illnesses in Huizhou, China, from 2011 to 2013. *Arch Virol.* 2014 Aug;  
425 159(8):2003-10. doi: 10.1007/s00705-014-2035-1. Epub 2014 Mar 9;
- 426 33. Hasman H, Pachucki CT, Unal A, Nguyen D, Devlin T, Peebles ME, et al.  
427 Aetiology of influenza-like illness in adults includes parainfluenzavirus type  
428 4. *J Med Microbiol.* 2009 Apr; 58(Pt 4):408-13. doi:  
429 10.1099/jmm.0.006098-0;

- 430 34. Falchi A, Turbelin C, Andreoletti L, Arena C, Blanchon T, Bonmarin I, et  
431 al. Nationwide surveillance of 18 respiratory viruses in patients with  
432 influenzalike illnesses. A pilot feasibility study in the French Sentinel  
433 network. *J Med Virol*. 2011 Aug; 83(8):1451-7. doi: 10.1002/jmv.22113.  
434 Epub 2011 Jun 2;
- 435 35. Do AH, van Doorn HR, Nghiem MN, Bryant JE, Hoang TH, Do QH, et al.  
436 Viral etiologies of acute respiratory infections among hospitalized  
437 Vietnamese children in Ho Chi Minh City, 2004-2008. *PLoS One*. 2011 Mar  
438 24; 6(3): e18176. doi: 10.1371/journal.pone.0018176;
- 439 36. He Y, Lin GY, Wang Q, Cai XY, Zhang YH, Lin CX, et al. A 3-year  
440 prospective study of the epidemiology of acute respiratory viral infections in  
441 hospitalized children in Shenzhen, China *Influenza Other Respir Viruses*.  
442 2014 Jul; 8(4):443-51. doi: 10.1111/irv.12257. Epub 2014 May 14;
- 443 37. Gurgel RQ, Bezerra PG, Duarte Mdo C, Moura AÁ, Souza EL, Silva LS, et  
444 al. Relative frequency, Possible Risk Factors, Viral Codetection Rates, and  
445 Seasonality of Respiratory Syncytial Virus Among Children With Lower  
446 Respiratory Tract Infection in Northeastern Brazil. *Medicine (Baltimore)*.  
447 2016 Apr; 95(15): e3090. doi: 10.1097/MD.0000000000003090;
- 448 38. Homaira N, Luby SP, Hossain K, Islam K, Ahmed M, Rahman M, et al.  
449 Respiratory Viruses Associated Hospitalization among Children Aged < 5  
450 Years in Bangladesh: 2010-2014. *PLoS One*. 2016 Feb 3;11(2): e0147982.  
451 doi: 10.1371/journal.pone.0147982. eCollection 2016;

- 452 39. Delangue J, Roca Sanchez Y, Piorkowski G, Bessaud M, Baronti C,  
453 Thirion-Perrier L, et al. Viral aetiology influenza like illnesses in Santa  
454 Cruz, Bolivia (2010–2012). *Virology*. 2014 Feb 24;11:35. doi: 10.1186/1743-  
455 422X-11-35;
- 456 40. Eccles R. Understanding the symptoms of the common cold and influenza.  
457 *Lancet Infect Dis*. 2005 Nov; 5(11):718-25;
- 458 41. rospotrebnadzor.ru [Internet]. On the outcome of the epidemic season of  
459 influenza and ARIs [cited 2018 June 3]. Available from:  
460 <http://www.rospotrebnadzor.ru/deyatelnost/epidemiological-surveillance/>;
- 461 42. Cebeý-López M, Herberg J, Pardo-Seco J, Gómez-Carballa A, Martínón-  
462 Torres N, Salas A, et al. Viral Co-Infections in Pediatric Patients  
463 Hospitalized with Lower Tract Acute Respiratory Infections. *PLoS One*.  
464 2015 Sep 2; 10(9): e0136526. doi: 10.1371/journal.pone.0136526.  
465 eCollection 2015;
- 466 43. Asner SA, Science ME, Tran D, Smieja M, Merglen A, Mertz D. Clinical  
467 Disease Severity of Respiratory Viral Co-Infection versus Single Viral  
468 Infection: A Systematic Review and Meta-Analysis. *PLoS One*. 2014 Jun  
469 16; 9(6): e99392. doi: 10.1371/journal.pone.0099392. eCollection 2014;
- 470 44. Huo X, Qin Y, Qi X, Zu R, Tang F, Li L, et al. Surveillance of 16  
471 respiratory viruses in patients with influenza-like illness in Nanjing, China. *J*  
472 *Med Virol*. 2012 Dec; 84(12):1980-4. doi: 10.1002/jmv.23401.

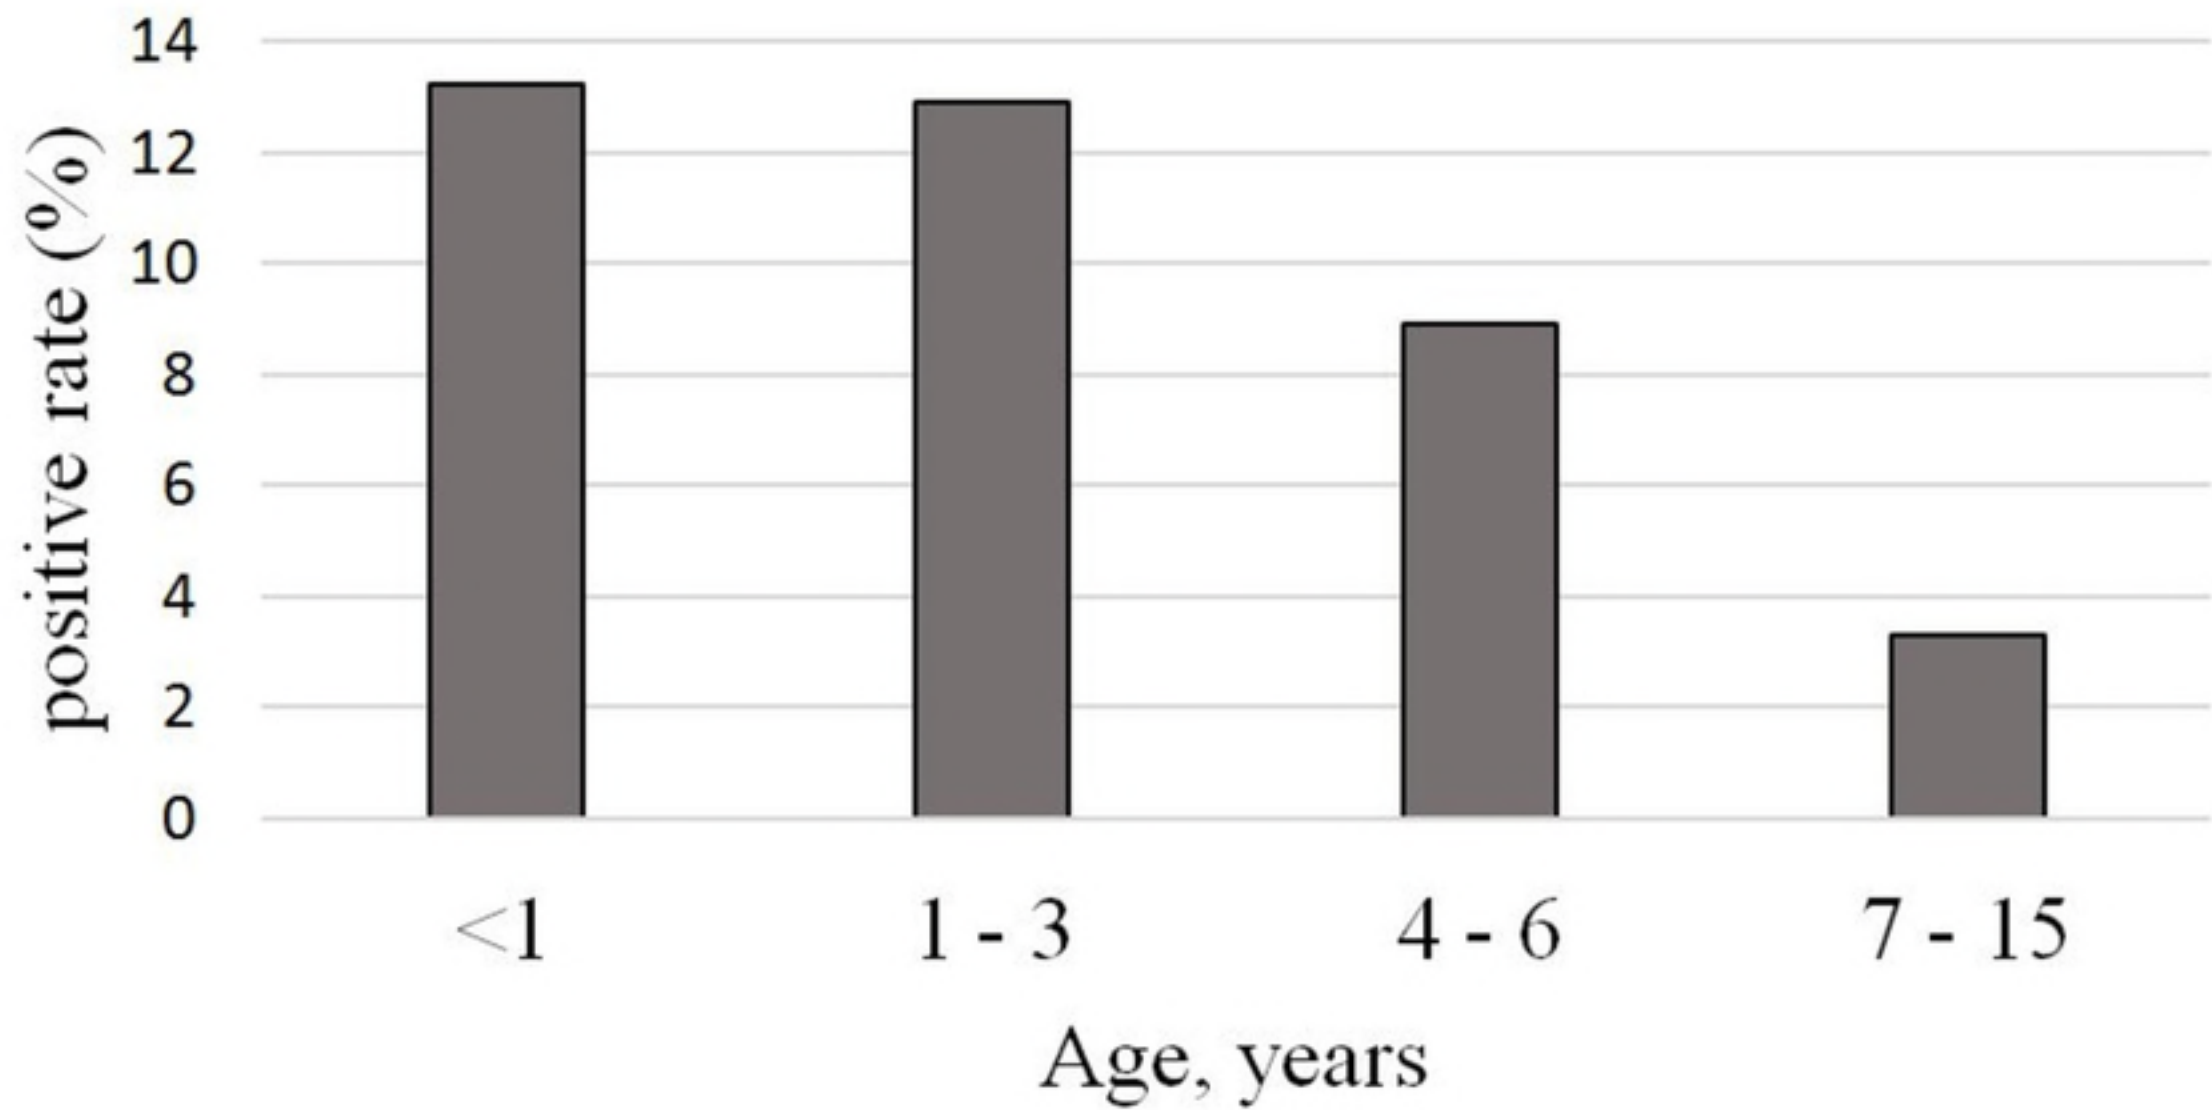



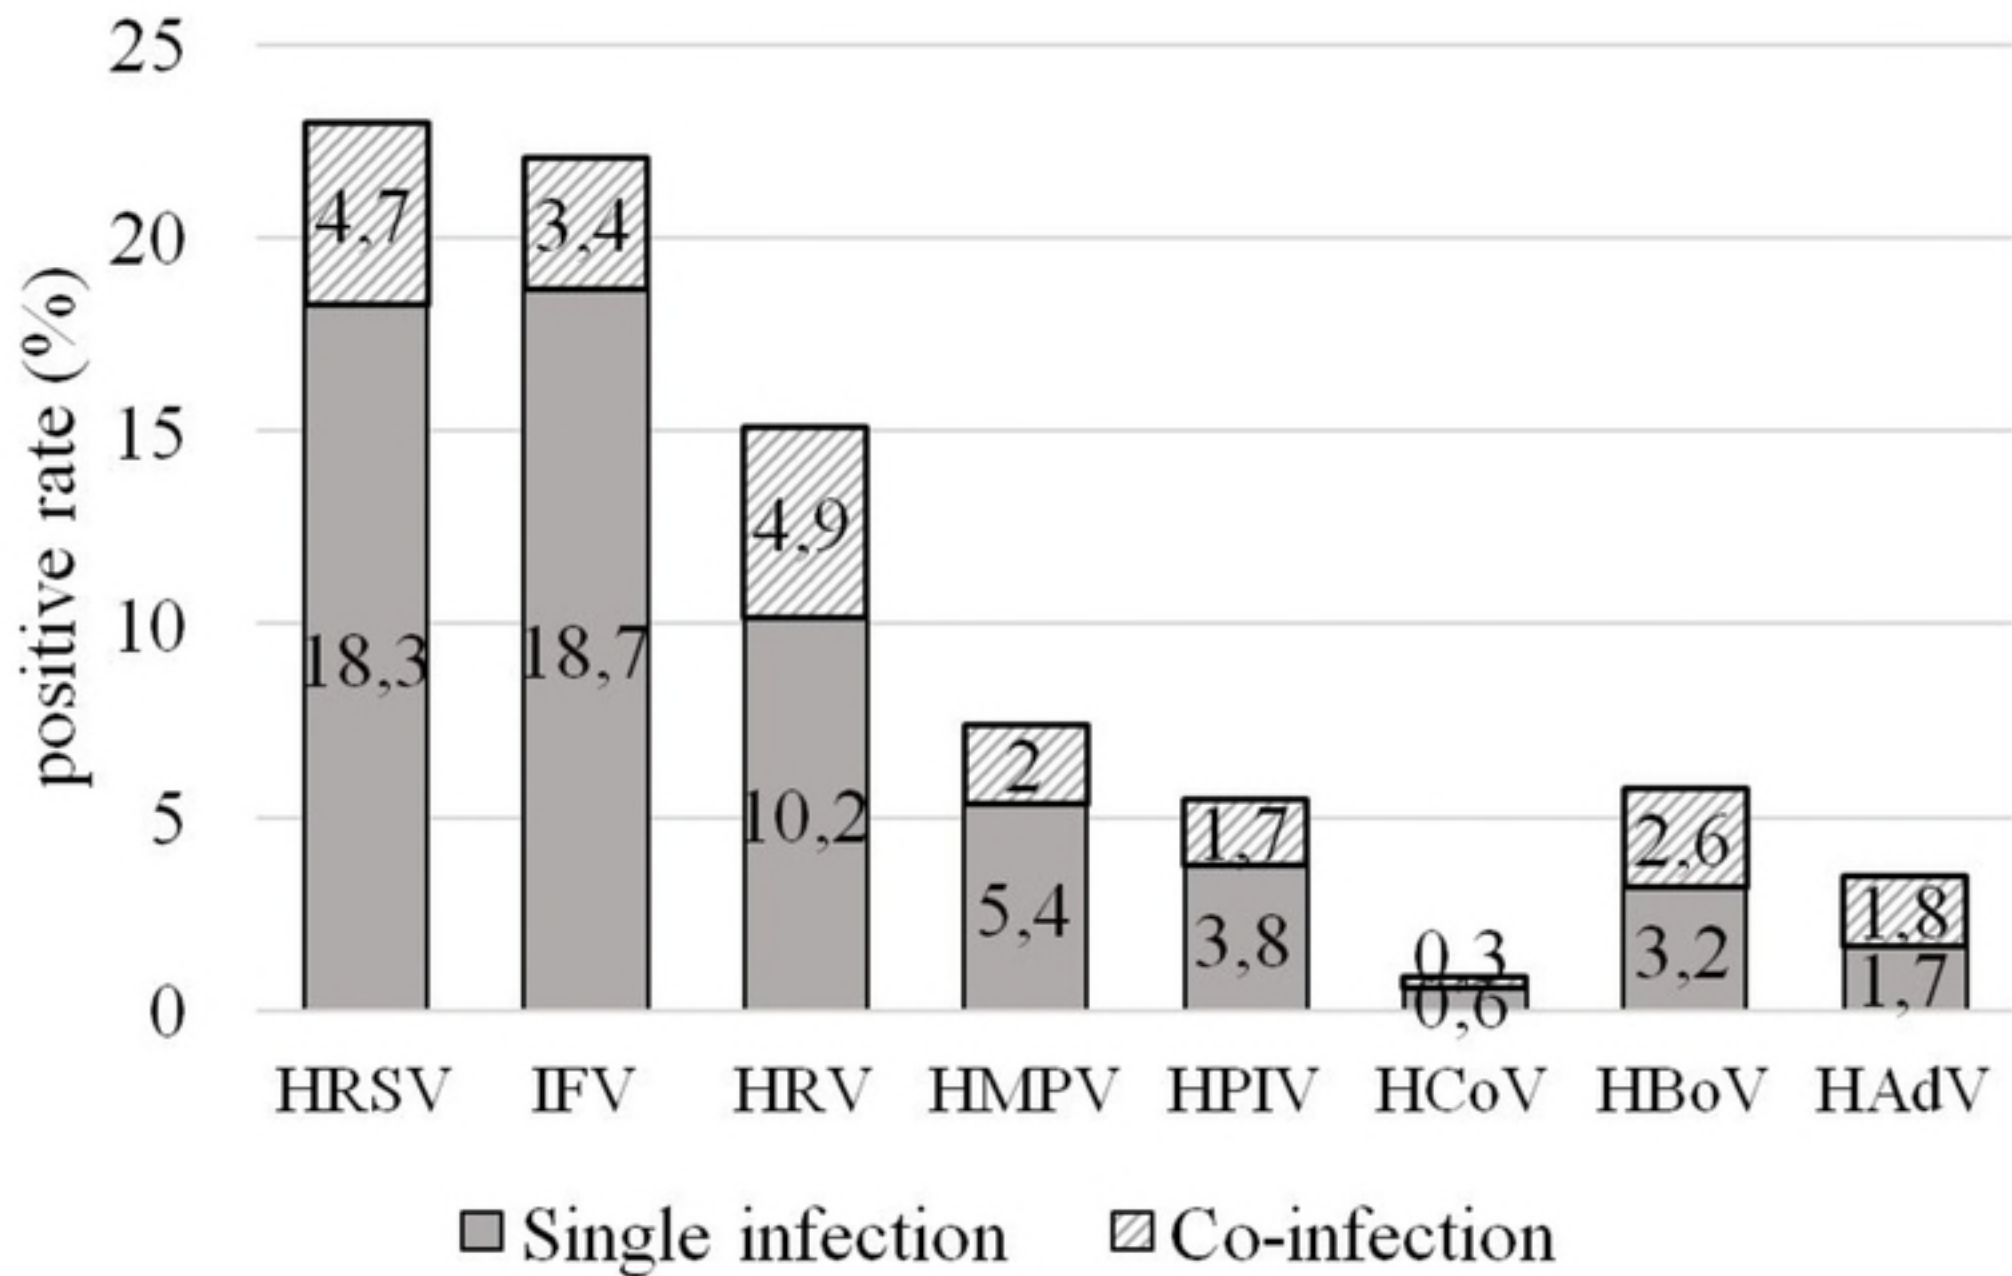

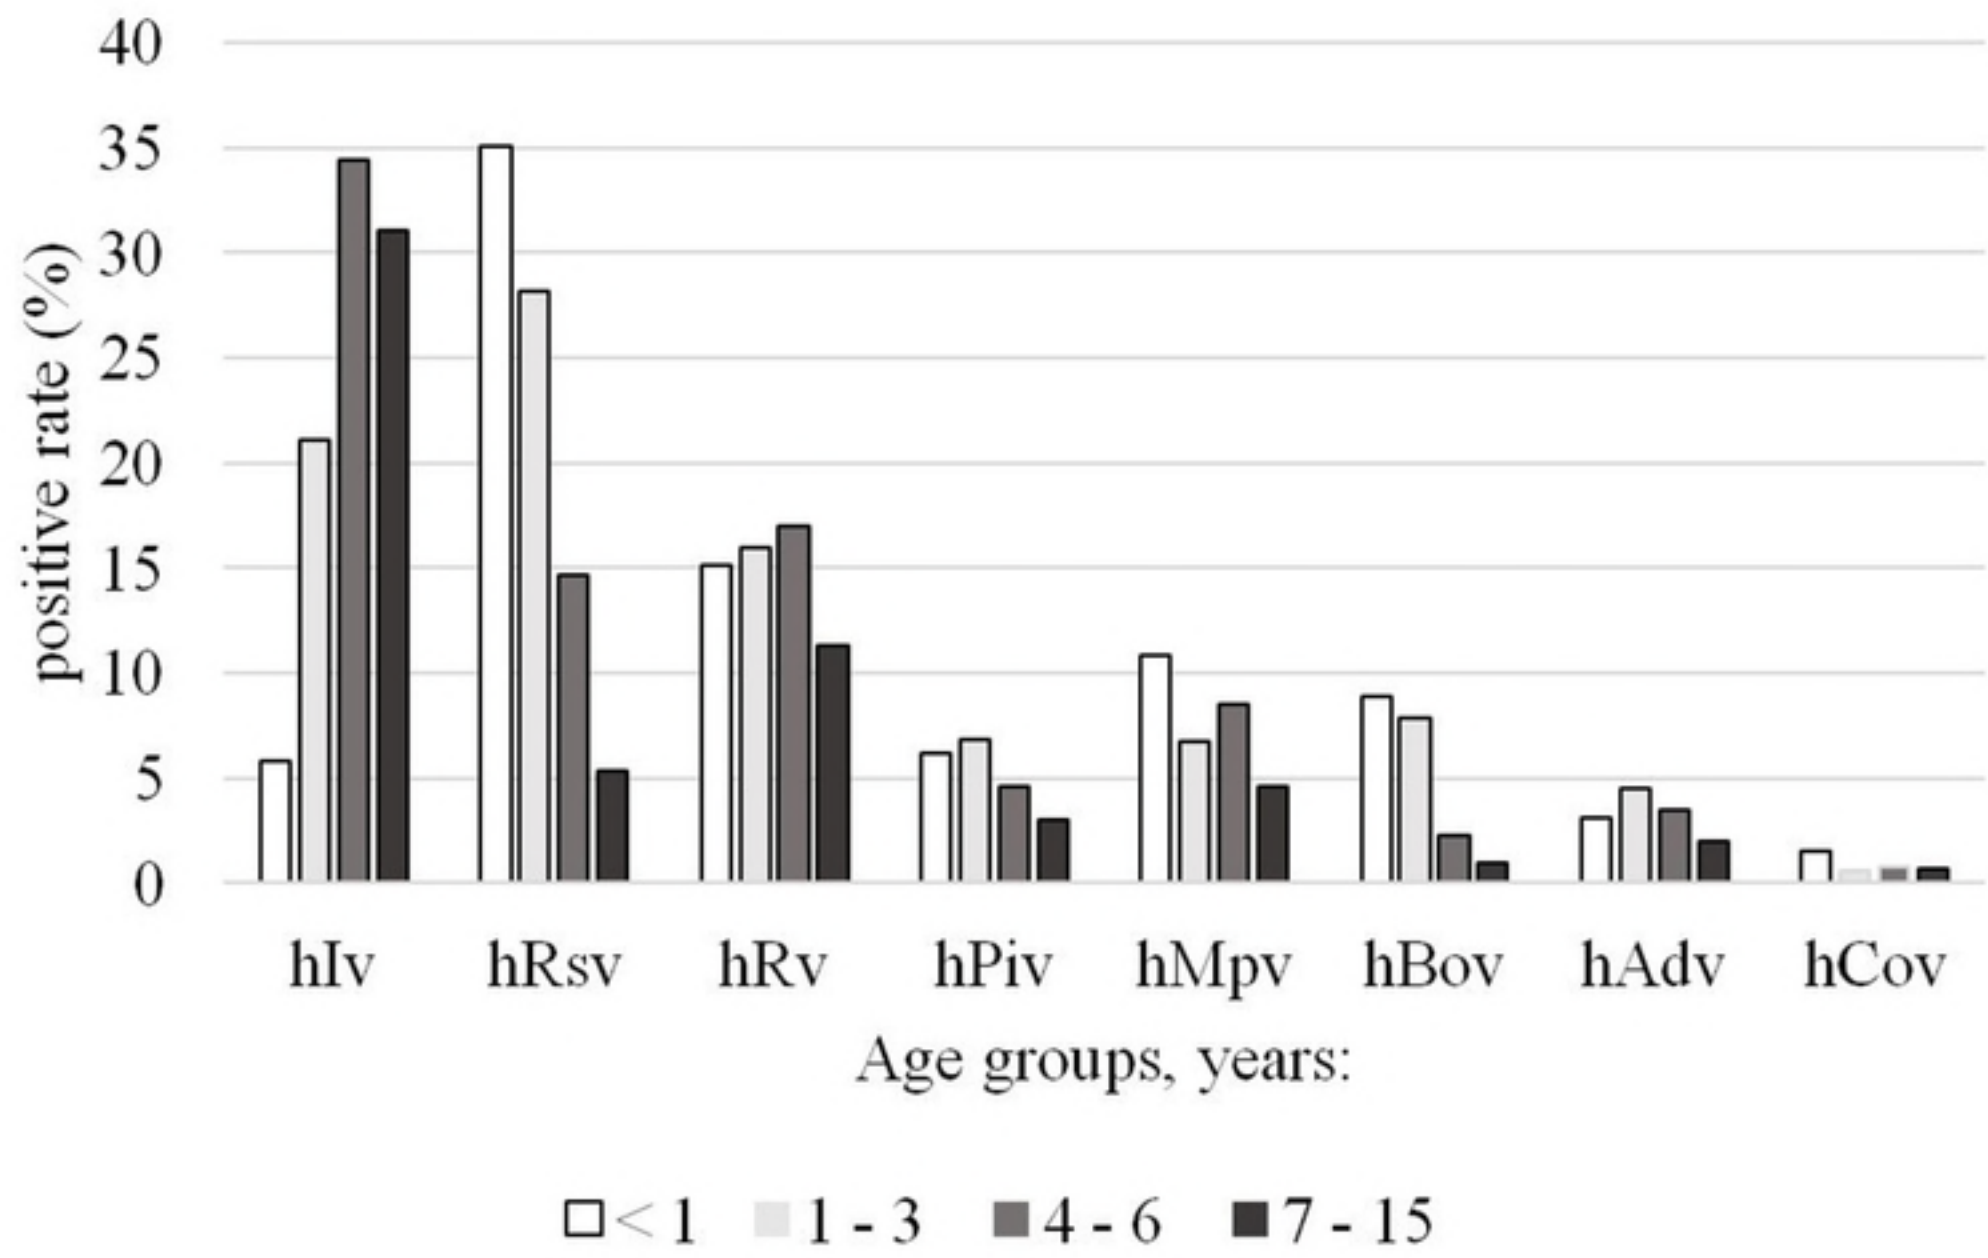

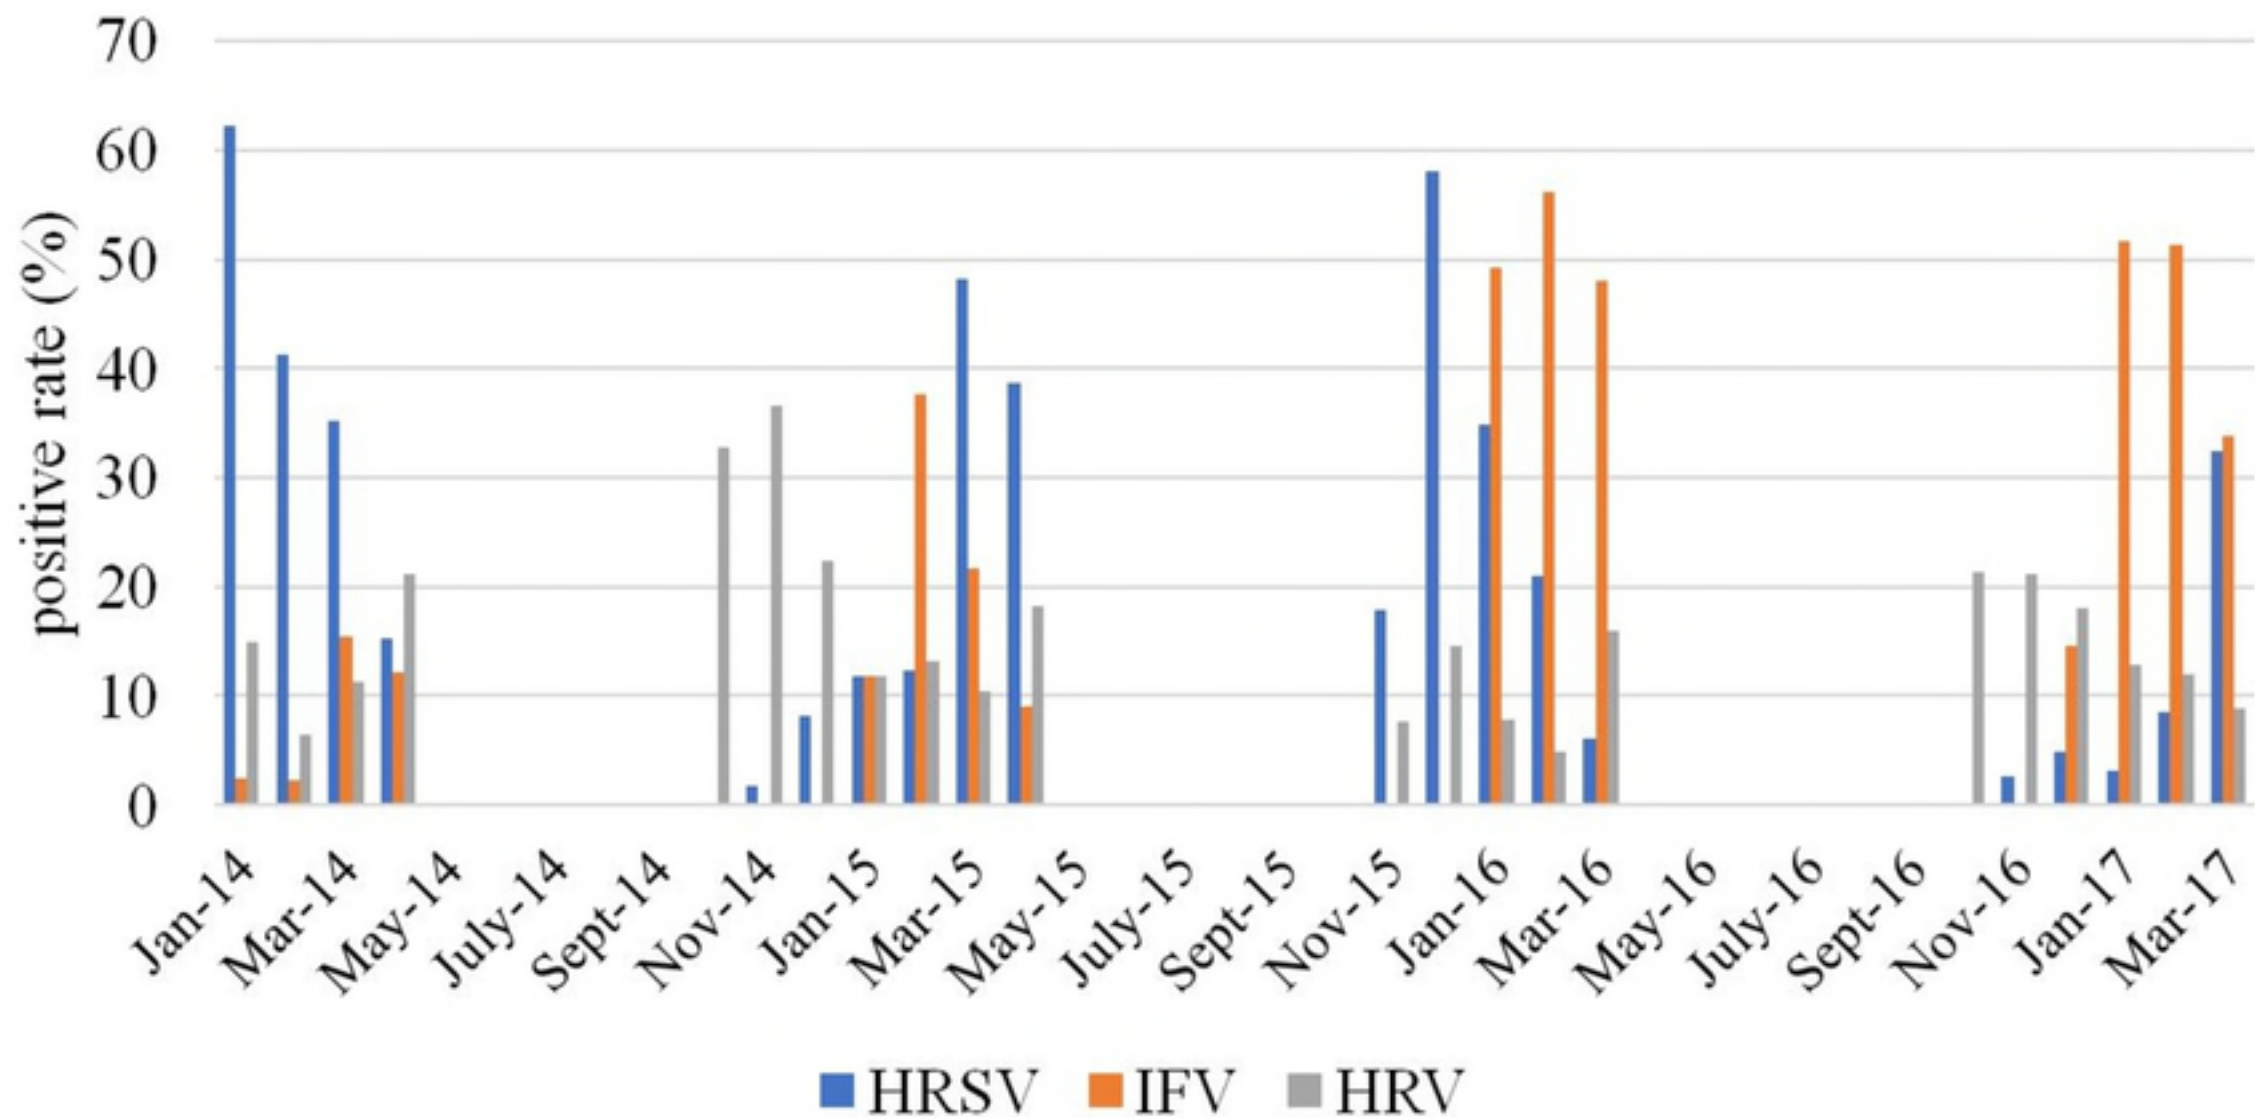

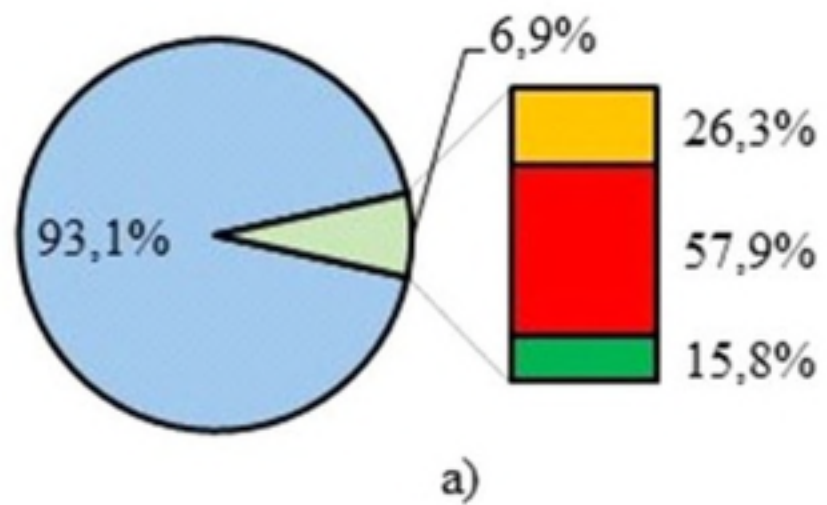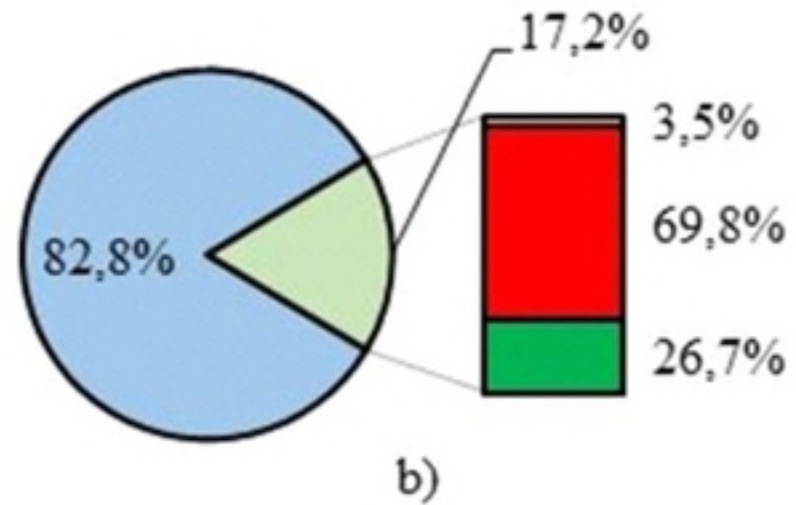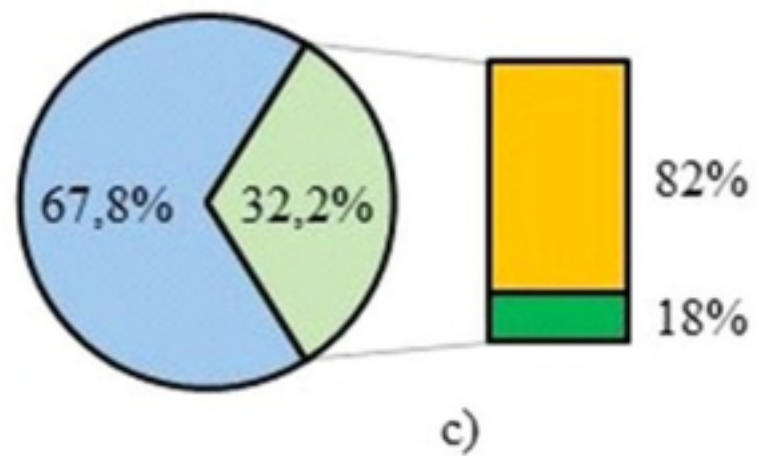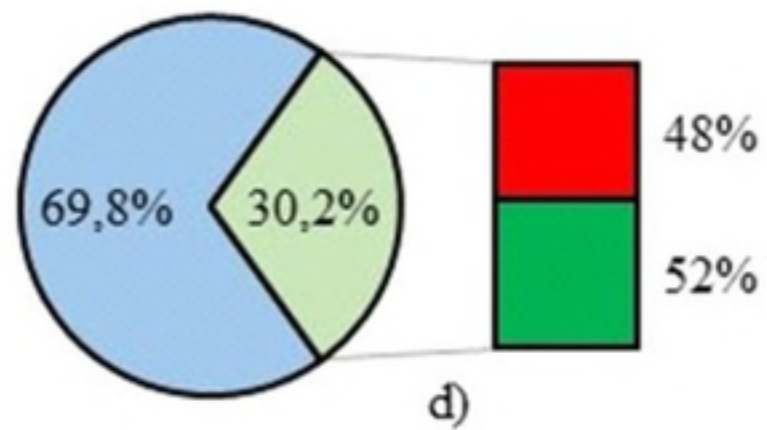

■ ARI   
 ■ A(H1N1)pdm09   
 ■ A(H3N2)   
 ■ B
